# Supplementary material for: Gold nanobipyramids doped with Au/Pd alloyed nanoclusters for high efficiency ethanol electrooxidation
Source: Royal Society of Chemistry journal article supplement (doi:10.1039/d1na00878a), 2022-01-01
Supplement: d1na00878a1.pdf [file d1na00878a1.pdf]

## Electronic Supplementary Information

### Gold nanobipyramid doped with Au/Pd alloyed nanoclusters for high efficiency ethanol electrooxidation

Baihe Hanqi,<sup>a</sup> Juan Xu,<sup>a</sup> Xingzhong Zhu<sup>a,b</sup> and Caixia Kan<sup>a,b,\*</sup>

<sup>a</sup> College of Science, Nanjing University of Aeronautics and Astronautics, Nanjing 210016, China. E-mail: cxkan@nuaa.edu.cn;

<sup>b</sup> MIIT Key Laboratory of Aerospace Information Materials and Physics, Nanjing University of Aeronautics and Astronautics, Nanjing 211106, China

\* Email: cxkan@nuaa.edu.cn

#### Supplementary figures

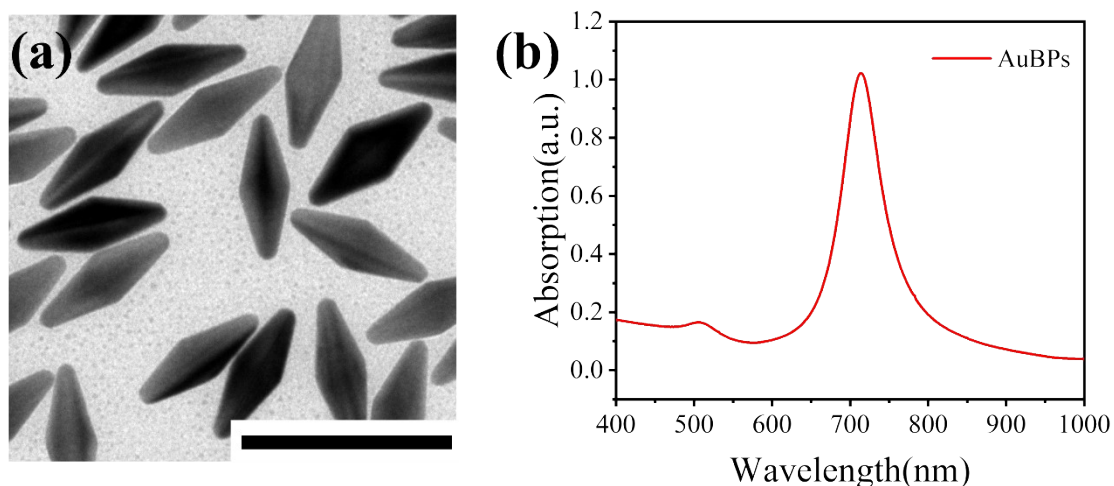

**Fig. S1** (a) TEM image and (b) corresponding optical spectrum of the AuBPs (Scale bars: 100 nm)

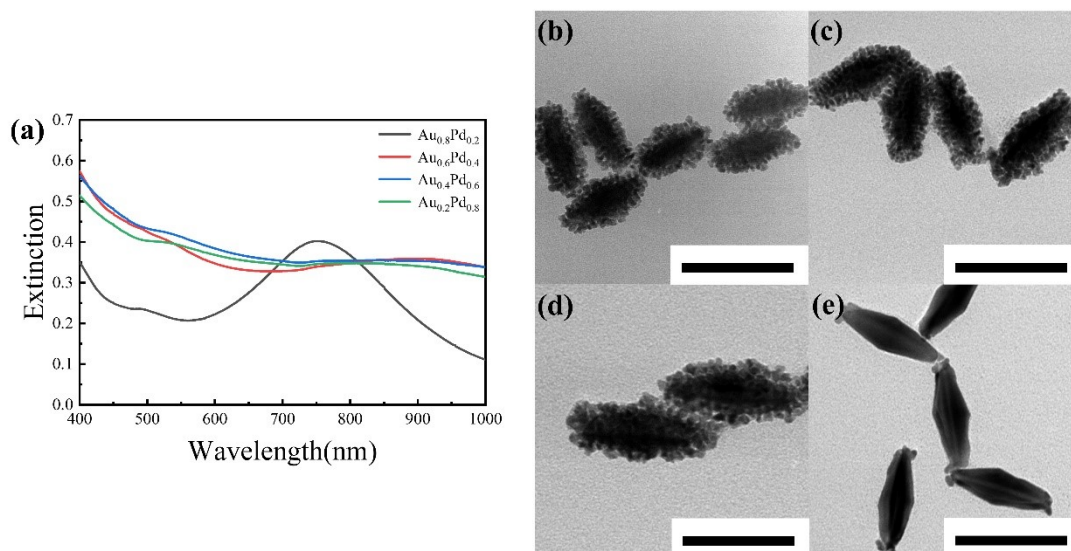

**Fig. S2** (a) UV-vis-NIR absorption spectra of AuBPs@Au<sub>x</sub>Pd<sub>1-x</sub> nanostructures with varying Au/Pd proportion in the alloy shell. TEM images of the nanostructures obtained under the addition of varying H<sub>2</sub>PdCl<sub>4</sub> of 2mM (b), 1.5mM (c), 1mM (d) and 0.25mM (e) obtained at 65°C with respective addition of 0.2 mL HAuCl<sub>4</sub> and 0.2 mL H<sub>2</sub>PdCl<sub>4</sub> (Scale bars: 100 nm).

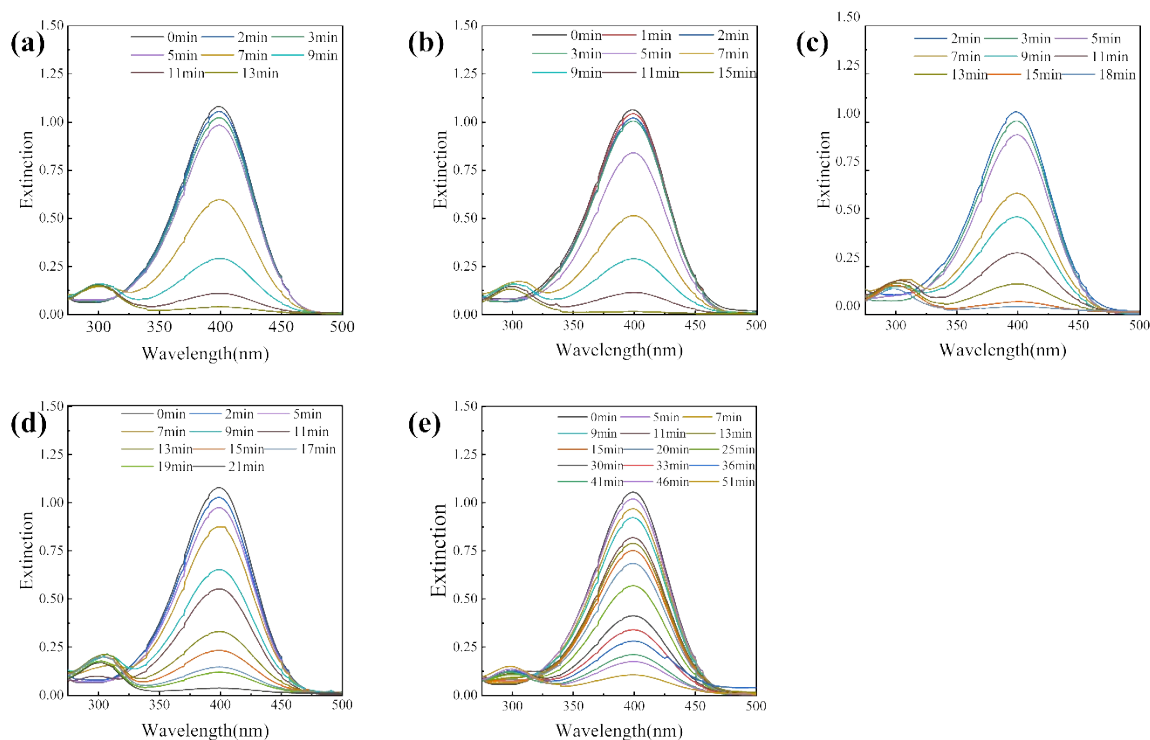

**Fig. S3** Absorption spectra of 4-NP reduced by NaBH<sub>4</sub> in the presence of AuBPs@Au<sub>x</sub>Pd<sub>1-x</sub>. (a) AuBPs@Au<sub>0</sub>Pd<sub>1</sub>, (b) AuBPs@Au<sub>0.2</sub>Pd<sub>0.8</sub>, (c) AuBPs@Au<sub>0.4</sub>Pd<sub>0.6</sub>, (d) AuBPs@Au<sub>0.6</sub>Pd<sub>0.4</sub>, (e) AuBPs@Au<sub>0.8</sub>Pd<sub>0.2</sub>.

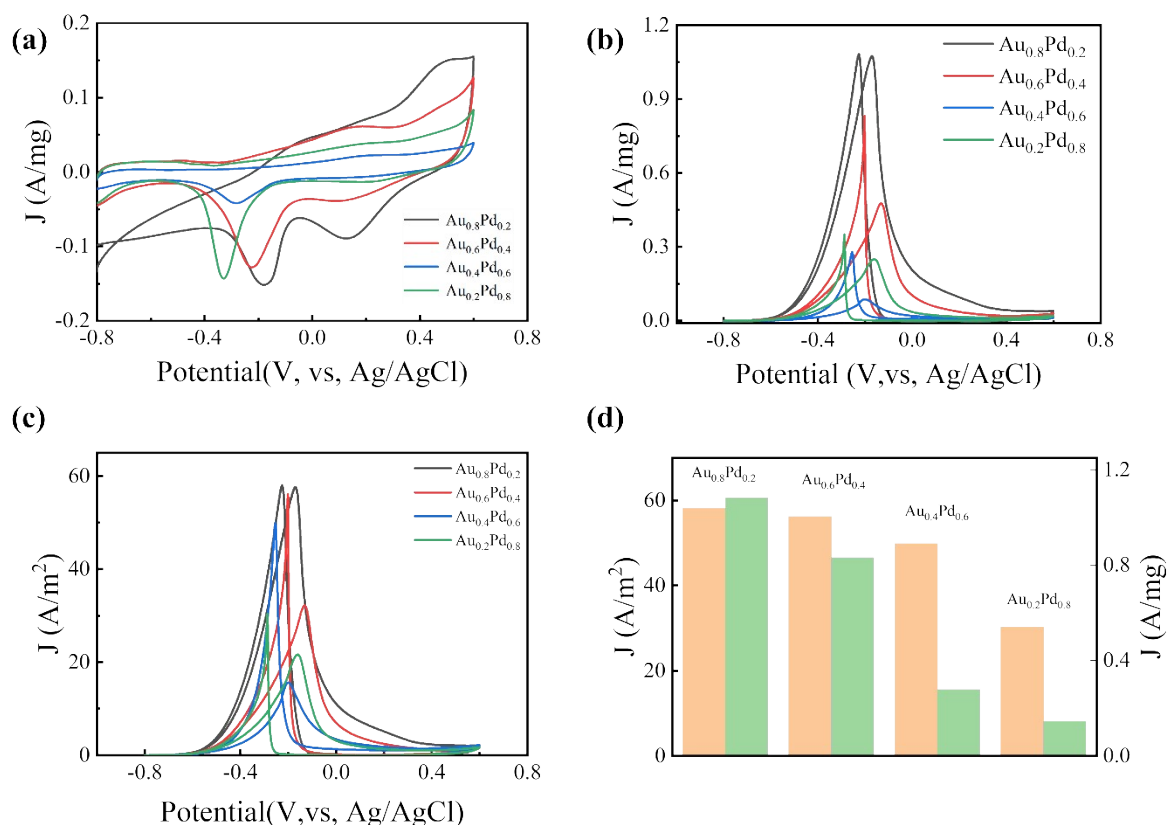

**Fig. S4** (a) Cyclic voltammograms for the AuBPs@Au<sub>x</sub>Pd<sub>1-x</sub> nanocatalysts in N<sub>2</sub>-saturated KOH (0.3M) solution at a scan rate of 50 mV s<sup>-1</sup>. (b) CV curves for the AuBPs@Au<sub>x</sub>Pd<sub>1-x</sub> nanocatalysts in N<sub>2</sub>-saturated KOH (0.3M) solution containing ethanol (0.5M) at a scan rate of 50 mV s<sup>-1</sup>. (c) CV curves by the ECSAs. (d) Mass activities (green) and specific activities (orange) of AuBPs@Au<sub>x</sub>Pd<sub>1-x</sub> nanocatalysts from measurement. Note: AuBPs@Au<sub>x</sub>Pd<sub>1-x</sub> nanocatalysts were obtained with addition of 0.2 mL HAuCl<sub>4</sub> and 0.2 mL H<sub>2</sub>PdCl<sub>4</sub>.

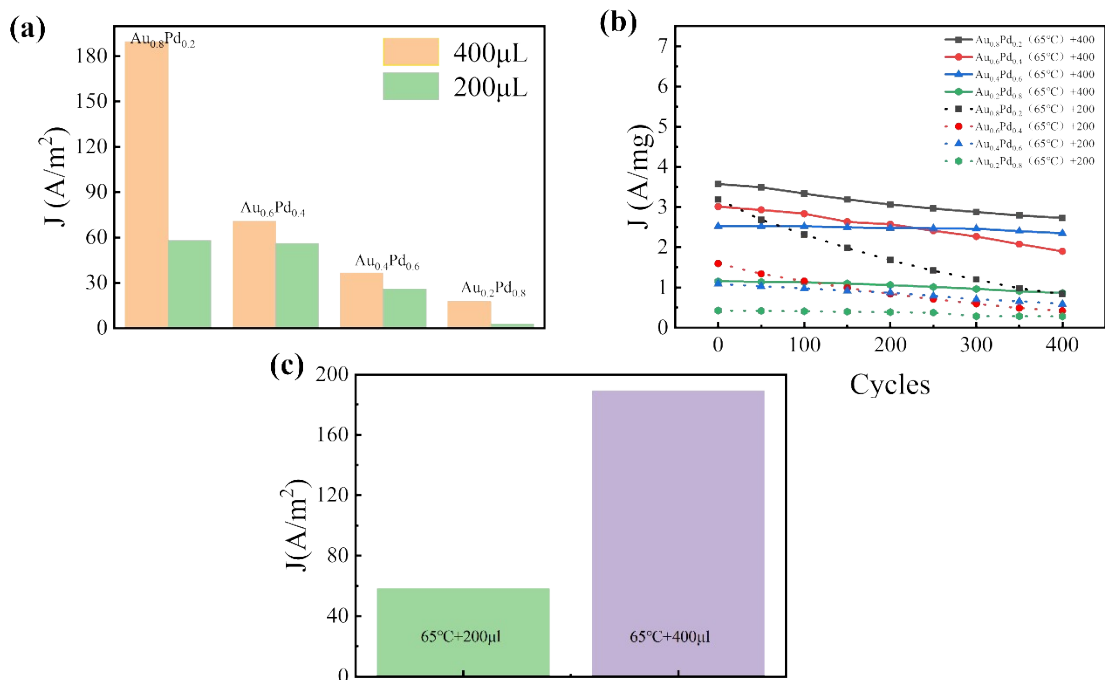

**Fig. S5** (a) specific activity of the AuBPs@Au<sub>x</sub>Pd<sub>1-x</sub> nanostructures obtained at 65°C with addition of HAuCl<sub>4</sub>/H<sub>2</sub>PdCl<sub>4</sub> precursor (0.2 mL and 0.4 mL). (b) Cycling measurement of the AuBPs@Au<sub>x</sub>Pd<sub>1-x</sub> nanocatalysts obtained at 65°C with addition of HAuCl<sub>4</sub>/H<sub>2</sub>PdCl<sub>4</sub> precursor (0.2 mL and 0.4 mL). (c) specific activity of the AuBPs@Au<sub>0.8</sub>Pd<sub>0.2</sub> nanocatalysts obtained at 65°C with addition of different volume of HAuCl<sub>4</sub>/H<sub>2</sub>PdCl<sub>4</sub> precursor (0.2 mL and 0.4 mL).

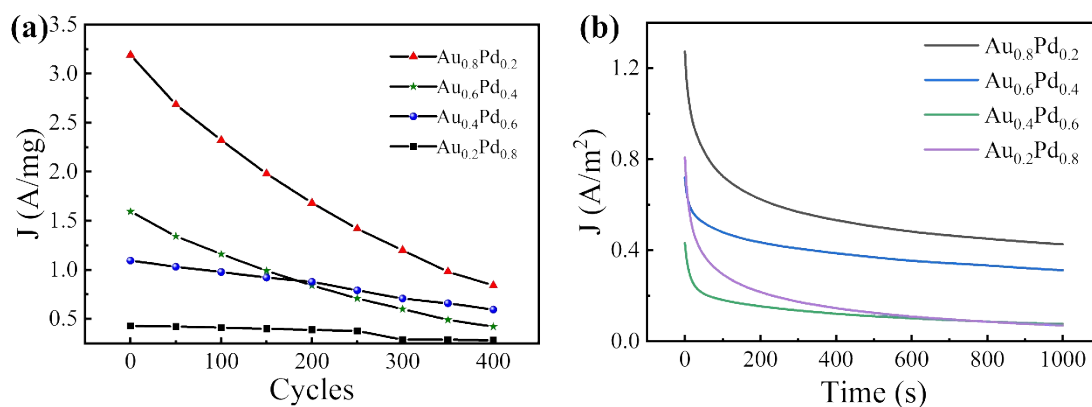

**Fig. S6** (a) Cycling measurement for AuBPs@Au<sub>x</sub>Pd<sub>1-x</sub> nanocatalysts with addition of 0.2 mL HAuCl<sub>4</sub>/H<sub>2</sub>PdCl<sub>4</sub> precursor. (b) Chronoamperometric curves in mixture solution of KOH (0.3M) and ethanol (0.5M) for 1000s at -0.23V versus Ag/AgCl potential.

**Table S1** The AuBPs@Au<sub>x</sub>Pd<sub>1-x</sub> with different concentration for Au and Pd precursors

| Sample                                    | Concentration of H <sub>2</sub> PdCl <sub>4</sub> (mM) | Concentration of HAuCl <sub>4</sub> (mM) | Amount of H <sub>2</sub> PdCl <sub>4</sub> (mL) | Amount of HAuCl <sub>4</sub> (mL) |
|-------------------------------------------|--------------------------------------------------------|------------------------------------------|-------------------------------------------------|-----------------------------------|
| AuBPs@Au <sub>0.8</sub> Pd <sub>0.2</sub> | 1                                                      | 0.25                                     | 0.4                                             | 0.4                               |
| AuBPs@Au <sub>0.6</sub> Pd <sub>0.4</sub> | 1                                                      | 1.5                                      | 0.4                                             | 0.4                               |
| AuBPs@Au <sub>0.4</sub> Pd <sub>0.6</sub> | 1.5                                                    | 1                                        | 0.4                                             | 0.4                               |
| AuBPs@Au <sub>0.2</sub> Pd <sub>0.8</sub> | 0.5                                                    | 2                                        | 0.4                                             | 0.4                               |
| AuBPs@Au <sub>0</sub> Pd <sub>1</sub>     | 2.5                                                    | 0                                        | 0.4                                             | 0.4                               |

**Table S2** Comparison of the AuBPs@Au<sub>x</sub>Pd<sub>1-x</sub> with different mole fractions for Au and Pd precursors.

| Sample                                    | Pd amount of substance concentration (mg/ L) | Pd mass percent | Au/Pd atomic ratio |
|-------------------------------------------|----------------------------------------------|-----------------|--------------------|
| AuBPs@Au <sub>0.8</sub> Pd <sub>0.2</sub> | 0.32                                         | 40.5%           | 44.2:55.8          |
| AuBPs@Au <sub>0.6</sub> Pd <sub>0.4</sub> | 0.50                                         | 50.0%           | 35.0:65.0          |
| AuBPs@Au <sub>0.4</sub> Pd <sub>0.6</sub> | 0.96                                         | 65.3%           | 25.5:74.5          |
| AuBPs@Au <sub>0.2</sub> Pd <sub>0.8</sub> | 1.92                                         | 80.3%           | 11.6:83.4          |
| AuBPs@Au <sub>0</sub> Pd <sub>1</sub>     | 3.02                                         | 82.9%           | 9.9:90.1           |
